# Supplementary material
Source: PubMed Central journal article supplement (PMC4423053)
Supplement: mmc1.pdf [file mmc1.pdf]

## SUPPORTING MATERIAL

### Single-cell rheology of human primary immune cells reveals distinct mechanical properties that are modified by inflammatory conditions

Nathalie Bafi,<sup>\*°</sup> Michael Saitakis,<sup>†‡°</sup> Stéphanie Dogniaux<sup>†‡</sup>, Oscar Buschinger,<sup>\*</sup> Armelle Bohineust<sup>†‡</sup>, Alain Richert,<sup>\*</sup> Mathieu Maurin<sup>†‡</sup>, Claire Hivroz<sup>†‡#</sup> and Atef Asnacios<sup>\*#</sup>

<sup>\*</sup>Laboratoire Matières et Systèmes Complexes, Université Paris-Diderot & CNRS, UMR 7057, Sorbonne Paris Cité, Paris, France.

<sup>†</sup> Institut Curie, Centre de Recherche, Pavillon Pasteur, Paris, France.

<sup>‡</sup> Institut National de la Santé et de la Recherche Médicale, Unité 932, Immunité et Cancer, Paris, France.

<sup>°</sup> Contributed equally

<sup>#</sup> Co-corresponding authors

Address reprint requests and inquiries to:

C. Hivroz, E-mail: [claire.hivroz@curie.fr](mailto:claire.hivroz@curie.fr) or

A. Asnacios, E-mail: [atef.asnacios@univ-paris-diderot.fr](mailto:atef.asnacios@univ-paris-diderot.fr)

**Figure S1**

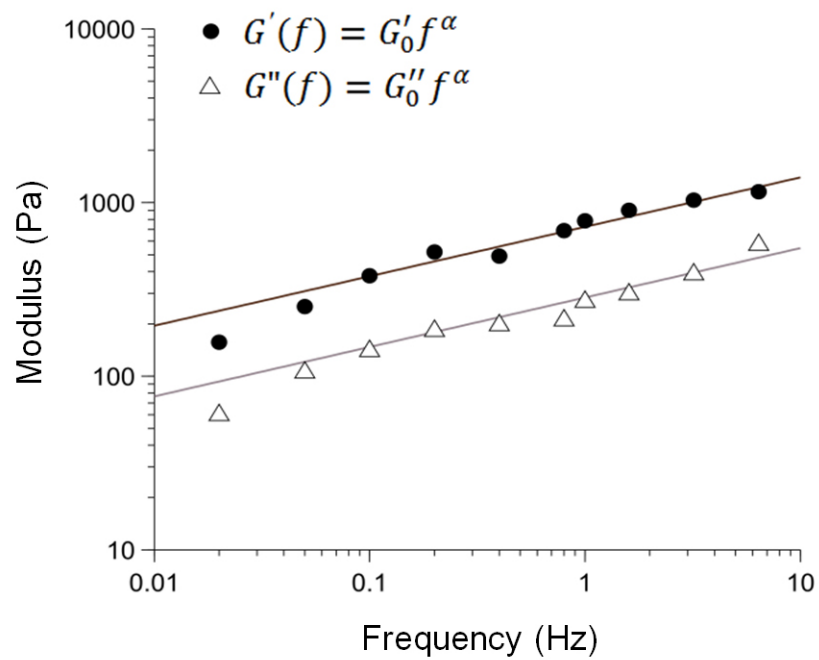

**Figure S1.** Example of storage modulus  $G'_0$  and loss modulus  $G''_0$  from a single-cell dynamic mechanical experiment. Both moduli behave as a power law of frequency. For each cell the pre-factors of the fits  $G'(f) = G'_0 f^\alpha$ ;  $G''(f) = G''_0 f^\alpha$  were extracted and used to compile statistics in each cell type and inflammatory condition. Measurements were performed on at least 15 individual cells from at least 3 different donors.

**Figure S2**

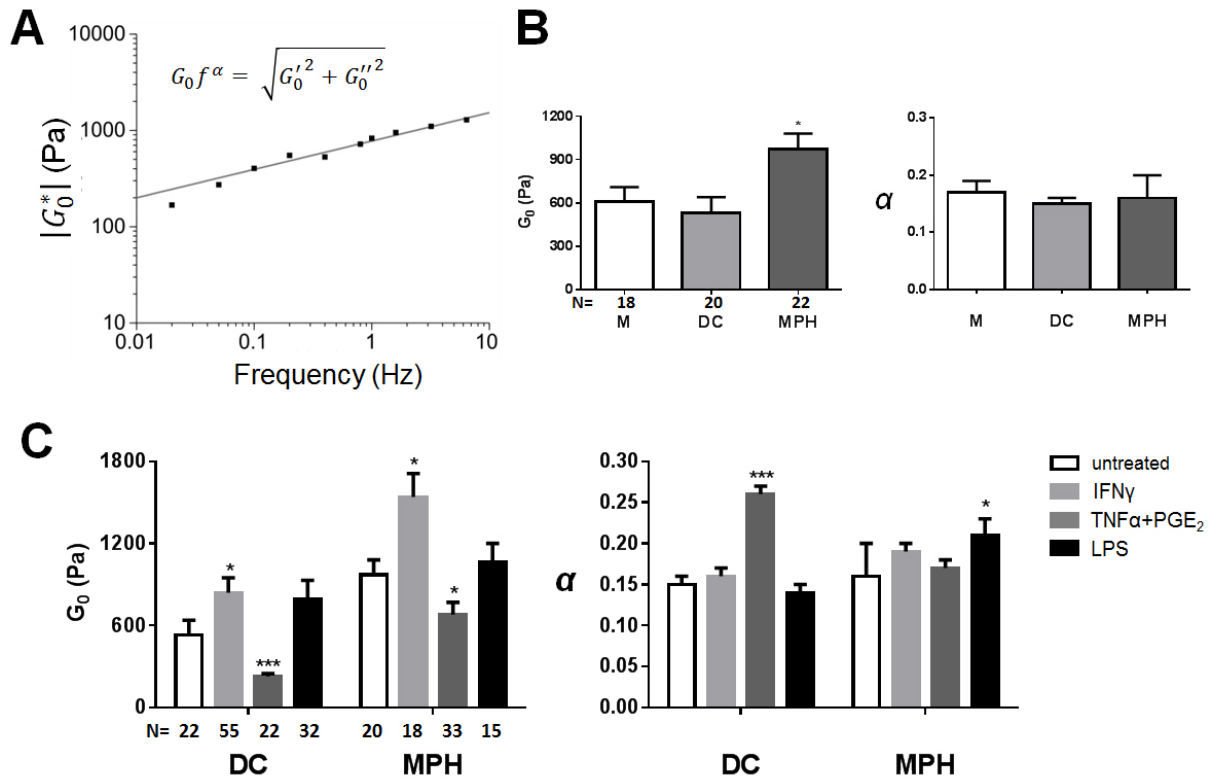

**Figure S2.** Complex viscoelastic measurement of single cells using the microplates assay. A) For each cell, the norm of the complex viscoelastic modulus  $|G_0^*| = \sqrt{G_0'^2 + G_0''^2}$  was plotted according to frequency. Data were fitted by a power law to extract the viscoelastic modulus  $G_0$  and exponent  $\alpha$ :  $|G_0^*| = G_0 f^\alpha$ , whose means were used as a comparison between (B) cell types and (C) inflammatory conditions. (\*  $p < 0.05$ , \*\*  $p < 0.01$ , \*\*\*  $p < 0.001$ , Mann-Whitney-U test compared to untreated. N: number of cells tested, from at least 3 different donors).

**Figure S3**

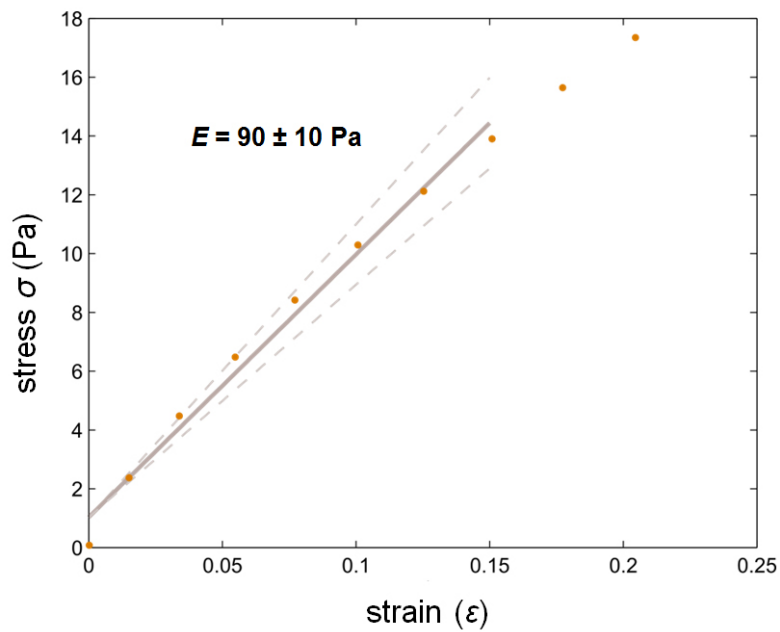

**Figure S3.** Estimation of Jurkat cell Young's modulus from single-cell viscoelastic measurements. Stress  $\sigma$  and strain  $\epsilon$  are obtained from the equations presented in the methods section. After plotting  $\sigma$  as a function of  $\epsilon$  (red dots), the Young's modulus is obtained by fitting the stress-strain curve (grey line) for strains below 15% (corresponding to experimental conditions). Dashed lines represent the standard error on the fit. The Young's modulus obtained for Jurkat cells is  $E = 90 \pm 10$  Pa.

**Figure S4**

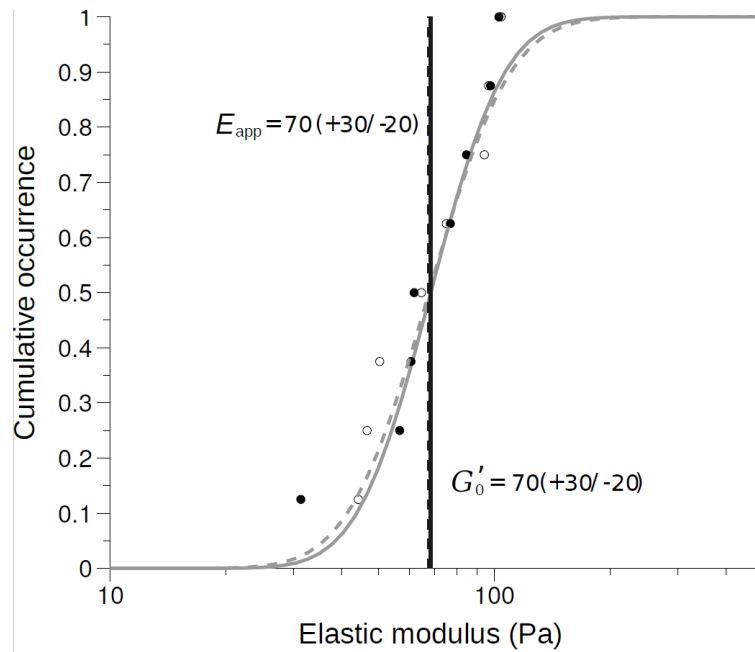

**Figure S4.** Equivalence between  $G'_0$  and  $E_{app}$  for Jurkat cells. For  $n = 8$  cells, both step-wise compression ( $E_{app}$  in dark circles) and dynamic mechanical analysis ( $G'_0$  in white circles) were performed. The distributions and mean represented respectively by full lines for step-wise compression and dashed lines for dynamic mechanical analysis are equal for both types of measurement performed.

Figure S5

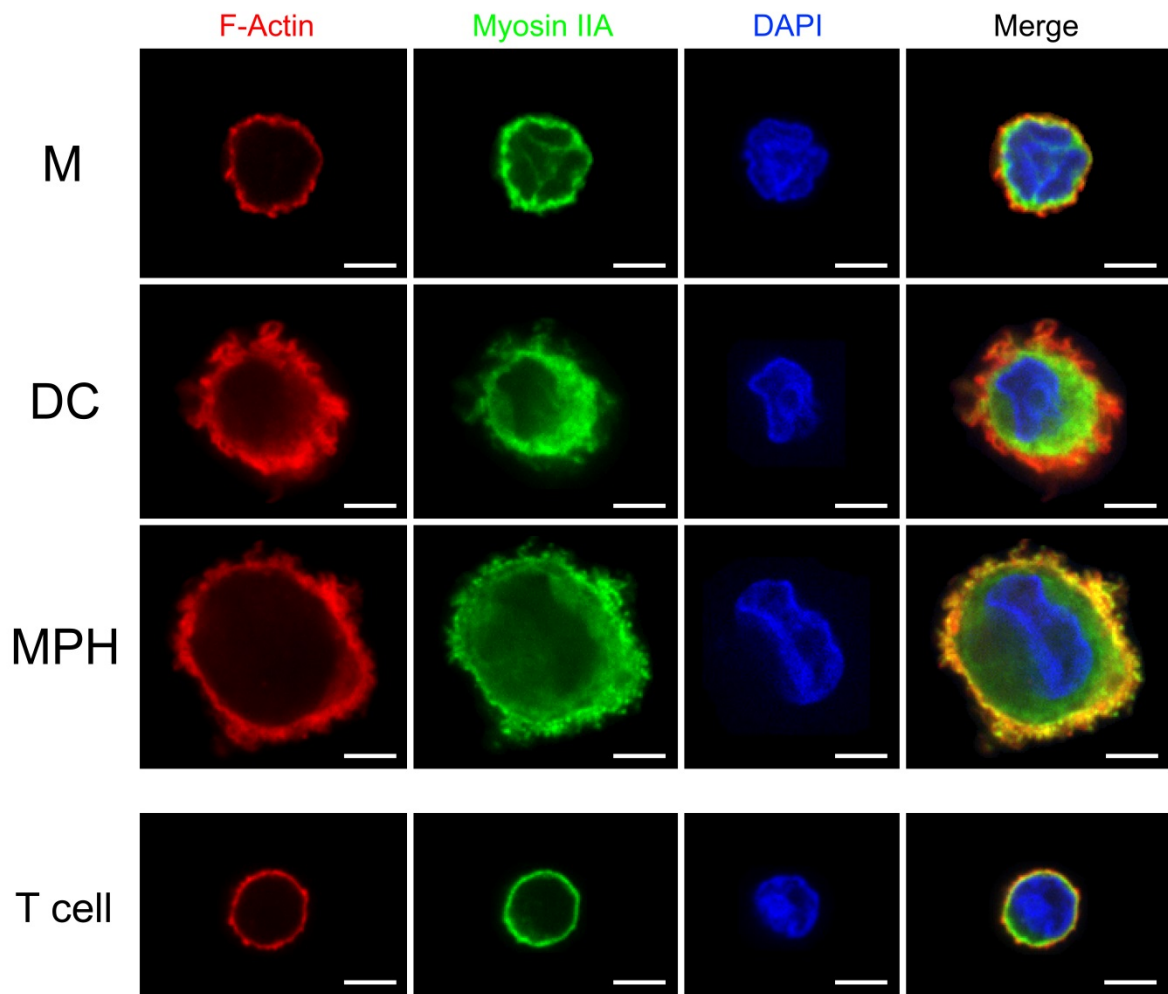

**Figure S5.** Antigen presenting cells (M, DC, MPH) were labeled with phalloidin, an anti-Myosin IIA antibody and DAPI. A representative confocal midplane is shown for each cell type. A labeled T cell is shown for comparison. Scale bar: 5  $\mu\text{m}$ .

Figure S6

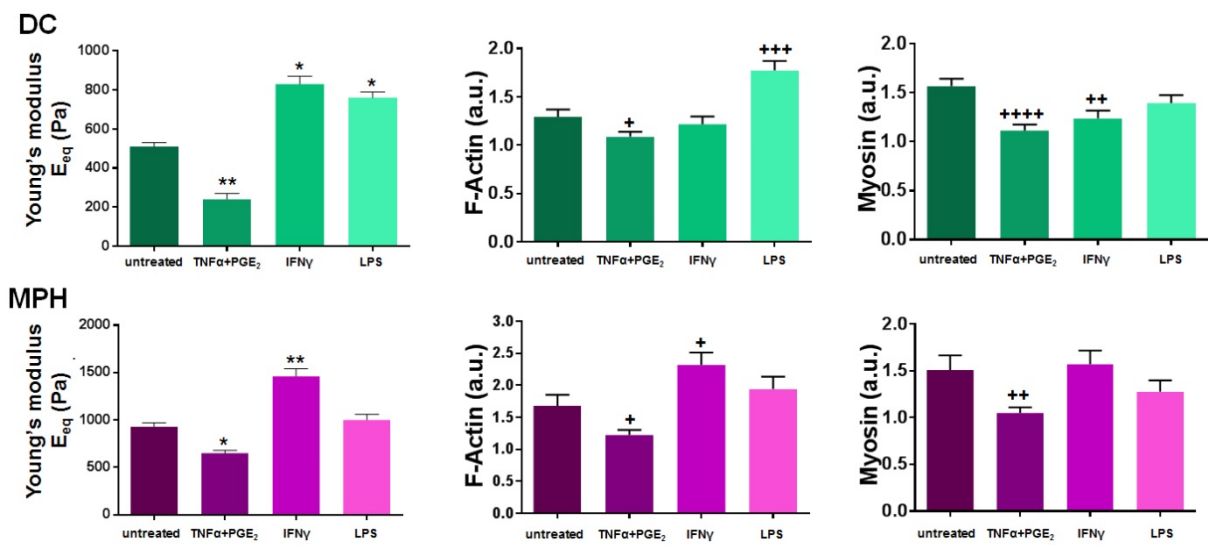

**Figure S6.** Values of equivalent Young's modulus  $E_{eq}$ , total F-Actin content and total myosin IIA heavy chain are shown for comparison of the effect of inflammatory conditions (TNF $\alpha$ +PGE<sub>2</sub>, IFN $\gamma$  or LPS) on A) DC, and B) MPH. (\*  $p < 0.05$ , \*\*  $p < 0.01$ , Mann-Whitney-U test compared to untreated, +  $p < 0.05$ , ++  $p < 0.01$ , +++  $p < 0.001$ , ++++  $p < 0.0001$ , unpaired t test with Welch's correction compared to untreated).

Figure S7

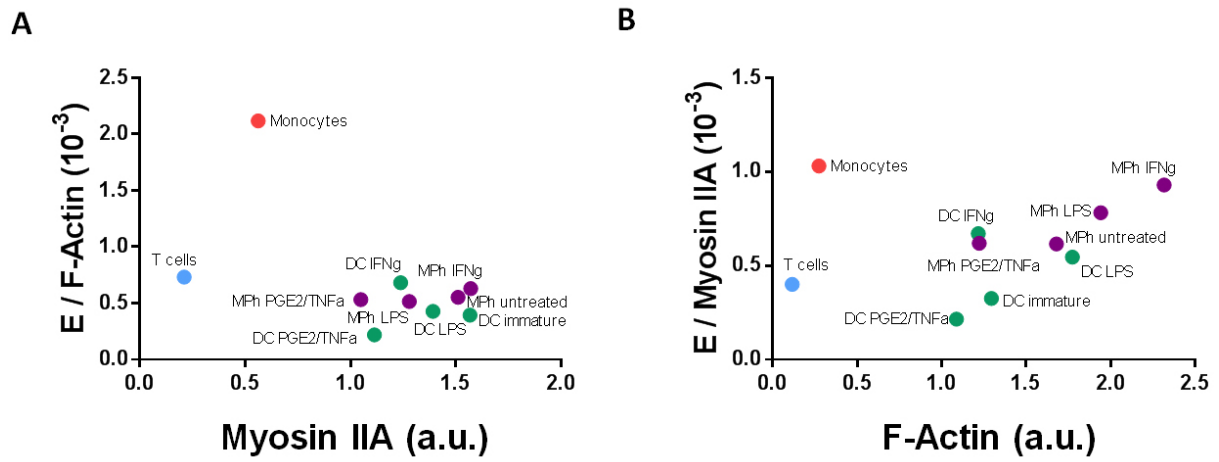

**Figure S7.** Plots of ratios: A) [ $E_{eq}$  / F-Actin] vs myosin IIA total content, and B) [ $E_{eq}$  / myosin IIA] vs F-Actin total content for Monocytes (●); T cells (●); DC (●) and MPH (●) for various inflammatory conditions.
